**Title:** Preparation of "stress-free" concanavalin A-conjugated Dynabeads® magnetic beads for CUT&Tag

**Authors:** Yasuhiro Fujiwara<sup>1,4</sup>, Yuji Tanno<sup>2</sup>, Hiroki Sugishita<sup>3</sup>, Yusuke Kishi<sup>3</sup>, Yoshinori Makino<sup>1</sup> and Yuki Okada<sup>1</sup>

**Affiliation:**

<sup>1</sup> Institute of Quantitative Biosciences, The University of Tokyo, Tokyo 113-0032, Japan

<sup>2</sup> Bioscience Department, VERITAS Corporation, Tokyo, Japan

<sup>3</sup> Graduate School of Pharmaceutical Sciences, The University of Tokyo, Tokyo, Japan

**<sup>4</sup> Correspondence:**

Yasuhiro Fujiwara

Institute of Quantitative Biosciences, The University of Tokyo, 1-1-1 Yayoi, Bunkyo-ku, Tokyo 113-0032, Japan

[y.fujiwara@iqb.u-tokyo.ac.jp](mailto:y.fujiwara@iqb.u-tokyo.ac.jp)

Tel: +81-3-5841-7831

## ABSTRACT

Epigenome research has employed various methods to identify genomic location of proteins of interest, such as transcription factors and histone modifications. A recently established method called CUT&Tag uses a Protein-A Tn5 transposase fusion protein, which cuts the genome and inserts adapter sequences nearby the target protein. Throughout most of the CUT&Tag procedure, cells are held on concanavalin A (con A)-conjugated magnetic beads. Proper holding of cells would be decisive for the accessibility of Tn5 to the chromatin, and efficacy of the procedure of washing cells. However, BioMag®Plus ConA magnetic beads, used in the original CUT&Tag protocol, often exhibit poor suspendability and severe aggregation. Here, we compared the BioMag beads and Dynabeads® magnetic particles of which conjugation of con A was done by our hands, and examined the performance of these magnetic beads in CUT&Tag. Among tested, one of the Dynabeads, MyOne-T1, kept excessive suspendability in a buffer even after overnight incubation. Furthermore, the MyOne-T1 beads notably improved the sensitivity in CUT&Tag assay for H3K4me3. In conclusion, the arrangement and the selection of MyOne-T1 refine the suspendability of beads, which improves the association of chromatin with Tn5, which enhances the sensitivity in CUT&Tag assay.

## INTRODUCTION

Over the past decade, understanding of transcriptional regulation through regulatory factors, including transcription factors (TFs) and histone modifications, has been accelerated along with the invention and spread of chromatin immunoprecipitation with sequencing (ChIP-seq) method. ChIP-seq has been a primary method to detect genomic location of proteins of interest in biological research. However, several limitations have been indicated; requiring large number of cells and costly deep sequencing, owing to solubilization of entire genome of cells, which indeed generate high background reads. To overcome these limitations, Dr. Henikoff's group invented Cleavage Under Targets and Release Using Nuclease (CUT&RUN), which used antibody and a Protein A-Micrococcal Nuclease (pA/MNase) fusion protein on unfixed cells (Meers et al., 2019; Skene and Henikoff, 2017). The same group further introduced a derived Cleavage Under Targets and Tagmentation (CUT&Tag),

which utilized a Protein A-Tn5 transposase (pA/Tn5) fusion protein instead of PAMNase (Kaya-Okur et al., 2020; Kaya-Okur et al., 2019). CUT&RUN and CUT&Tag require remarkably reduced number of cells, while the sequence profiling resolution is remarkably increased. In both methods, cells are bound to concanavalin A (con A)-coated magnetic beads and are handled throughout the process until the DNA extraction step. To date, options for commercially available con A-coated magnetic beads were limited at this point. Further, the con A-coated magnetic beads, BioMag®Plus ConA magnetic beads (here after BioMag), used in the original protocols are difficult to handle because of its poor suspendability and severe aggregation. One might argue that efficiency of enzyme reaction in either protocol would be suffered.

To solve this issue, we evaluated different kinds of Dynabeads® magnetic beads (hereafter Dynabeads) that vary in size, cell binding capacity, or water binding capacity in order to verify whether the Dynabeads can be an alternative choice for the conventional con A-coated magnetic beads.

## **MATERIALS and METHODS**

### **Preparation of Con A-coated beads**

Four different streptavidin-conjugated Dynabeads, M-270, M-280, MyOne C1, and MyOne T1, that are capable of binding to biotin-conjugated concanavalin A (con A) were purchased from Thermo Fisher (Table 1). To conjugate con A, 100  $\mu$ L of each beads is washed with 1 $\times$  PBS (pH 6.8) for three times and resuspended in 100  $\mu$ L of 1 $\times$  PBS (pH 6.8) containing 0.01% Tween-20. Fifty  $\mu$ L of biotin-conjugated con A solution (2.3 mg/mL, Sigma Aldrich, C2272) in 1 $\times$  PBS (pH 6.8) containing 0.01% Tween-20 is added to the beads, and rotated for 30 min at room temperature (RT). The beads are briefly spun down, and the supernatant is removed and used for measuring unbound con A in a "con A binding assay". The remaining beads are resuspended in 100  $\mu$ L of 1 $\times$  PBS (pH 6.8) containing 0.01% Tween-20, and then used for "cell-binding assay" or the CUT&Tag procedure. BioMag from the original CUT&Tag protocol (Bangs Laboratories, BP531) (Kaya-Okur et al., 2020; Kaya-Okur et al., 2019) are used for comparison.

### **Con A binding assay**

Nanodrop One, a micro-UV/Vis spectrophotometer (Thermo Fisher) is used to measure the unbound con A in the supernatant. An absorbance based on the Protein A280 is measured with three technical replicates (**Figure 1A**).

### **Preparation of testicular cells for binding assay**

Mouse testicular cells are obtained by the following method (La Salle et al., 2009) with some modifications. Briefly, testes are obtained from a C57BL/6J mouse at 20 days-postpartum (dpp), and detunicated. The seminiferous tubules are placed in a 20 mL of KRB medium (120 mM NaCl, 4.8 mM KCl, 25.2 mM NaHCO<sub>3</sub>, 1.2 mM KH<sub>2</sub>PO<sub>4</sub>, 1.2 mM MgSO<sub>4</sub>•7H<sub>2</sub>O, 1.3 mM CaCl<sub>2</sub>, Pen/Strep (Gibco, 11548876), 11.1 mM D-glucose, essential amino acid (Gibco, 11130036), and nonessential amino acid (Gibco, 12084947), and containing collagenase type I (0.5 mg/mL, Wako, 035-17604), and incubated for 30 min at 32 °C with shaking at 250 rpm. The seminiferous tubules are washed twice with KRB medium. The tubules are further digested in 20 mL of fresh KRB medium containing Trypsin (0.5 mg/mL Wako, 207-19982) and DNase I (1 µg/mL, Wako, 314-08071) for 15 min at 32°C with shaking at 250 rpm to obtain single cell suspension. After a quick spin, cell pellets are washed twice with KRB medium containing 2% FBS and DNase I (1 µg/mL), and resuspended in 1× PBS (pH 6.8).

### **Cell-binding assay**

To obtain cultured cells, human lymphoma cell line Daudi (JCRB9071) and Large T-transformed human embryonic kidney cell line HEK293T (RIKEN BRC2202) are cultured in D-MEM medium (Wako, 044-29765) supplemented with 10% FBS, GlutaMAX (Gibco, 25050-061), Pen/Strep (Gibco, 15140-122) or RPMI-1640 medium (Wako, 189-02025) supplemented with 10% FBS, respectively, in a humidified air condition containing 5% CO<sub>2</sub> at 37 °C. 10 µL of each con A-conjugated magnetic beads are mixed with mouse testicular cells ( $4 \times 10^5$  cells), Daudi ( $5 \times 10^5$  cells), or HEK293T ( $2 \times 10^5$  cells), respectively, and incubated for 30 min at RT. Cells bound to con A-conjugated beads are captured with a magnetic stand (FG-SSMAG2, FastGene), and numbers of con A beads-unbound cells in

supernatant are counted using a Scepter 2.0 automated cell counter (Merck) and 60  $\mu$ L sensor (**Figure 1C**).

### **CUT&Tag**

CUT&Tag is performed according to the previous publication (Kaya-Okur et al., 2019) and its updated modifications available online ([www.protocols.io](http://www.protocols.io)). Briefly, Tn5-adaptor complex is prepared by annealing each of Mosaic end-adaptor A (ME-A) and Mosaic end-adaptor B (ME-B) oligonucleotides with Mosaic end-reverse oligonucleotides. To obtain Protein A-Tn5 fusion protein, the expression vector, 3XFlag-pA-Tn5-FI (Addgene plasmid #124601) is transfected into *E. coli* strain BL21-pLysS Singles™ Competent Cells (Novagen, 70236) and cultured in 50 mL of LB medium containing ampicillin (100  $\mu$ g/mL) at 180 rpm at 37 °C until OD<sub>600</sub>=0.9. Protein production is induced by adding IPTG (0.25 mM) and incubated at 180 rpm at 10 °C overnight, then at 180 rpm 23 °C for 4 hrs. The bacterial pellet is resuspended in 20 mL of HEGX buffer (20 mM HEPES-KOH (pH 7.2), 0.8 M NaCl, 1 mM EDTA, 10% glycerol, 0.2% Triton X-100) containing Complete Protease inhibitor cocktail (Roche), and lysed by sonication. After centrifugation at 12,000  $\times$  g at 4 °C for 30 min, 1/40 volume of 10% neutralized PEI is added, and incubated at 4 °C for 30 min. The collected supernatant is filtered through 0.45  $\mu$ m mesh, and 7 mL of chitin slurry resin (NEB, S6651S) is added and incubated at 4 °C overnight. The fusion protein is eluted with total 17.5 mL of elution buffer (HEGX buffer containing 100 mM DTT), and dialyzed with 500 mL of Dialysis buffer (100 mM HEPES-KOH (pH 7.2), 100 mM NaCl, 0.2 mM EDTA, 2 mM 2-ME, 0.2% Triton X-100, 20% Glycerol). the fusion protein is further purified in IEX-A buffer by using HiTrap SP1 and ACTA start (GE Healthcare Life Sciences). The Protein A-Tn5 fusion protein is mixed with pre-annealed ME-A and ME-B oligonucleotides. Ten  $\mu$ L of either con A-conjugated Dynabeads MyOne T1 (hereafter MyOne T1) or BioMag was added to 100  $\mu$ L Binding buffer (20 mM HEPES pH 7.5, 10 mM KCl, 1 mM CaCl<sub>2</sub>, 1 mM MnCl<sub>2</sub>). After washing the beads with the Binding buffer twice, they are resuspended in a 10  $\mu$ L of the Binding buffer, and 1.5 mL Wash buffer was added [20 mM HEPES pH 7.5, 150 mM NaCl, 0.5 mM spermidine, Complete Protease Inhibitor cocktail (Roche)]. At this point, each tube contains ~100,000 Daudi cells. The cell-containing tubes (two replicate samples are prepared for

each assay) are rotated for 10 min at RT. After removing the buffer, the beads-bound cells are resuspended in 50  $\mu$ L of ice-cold Antibody buffer (Wash buffer containing 0.05% digitonin, 2 mM EDTA, 0.1 % BSA), and 0.5  $\mu$ g of anti-H3K4me3 mouse monoclonal antibody (Abcam, ab12209) or the same amount of mouse IgG (BioLegend, 400101) is added to a tube. The tube is placed on an ELMI Intelli-mixer (PM-2m, ELMI), and mixed overnight at 4 °C (set with mode F8 at 30 rpm). After a quick spin, the tubes are placed on a magnet stand and the buffer is removed. The beads are then resuspended in 100  $\mu$ L of Dig-wash buffer (Wash buffer containing 0.05% digitonin) containing the anti-mouse IgG (H&L) secondary antibody (1.1  $\mu$ g, 610-4120, ROCKLAND), and placed on an ELMI Intelli-mixer (ELMI) and mixed for 60 min at RT. The beads are then repeatedly washed with a 1 mL of Dig-wash buffer for 9 times. The washed beads are resuspended in 100  $\mu$ L of the pA-Tn5 mix (final concentration 50 nM) containing Dig-300 buffer (20 mM HEPES pH 7.5, 300 mM NaCl, 0.5 mM spermidine, 0.01 % digitonine, Complete Protease Inhibitor cocktail) (1:250 dilution of 12.5  $\mu$ M pA-Tn5 stock), and gently mixed by vortex. The tubes are placed on an ELMI Intelli-mixer (ELMI) and mixed for 1 hr at RT. After a quick spin, the tubes are placed on a magnet stand (12321D, Invitrogen) until the buffer turns clear. After removing the buffer, the beads are washed with 1 mL of Dig-300 buffer twice, and resuspended with 300  $\mu$ L of Tagmentation buffer (Dig-300 buffer containing 10 mM MgCl<sub>2</sub>), gently mixed, and incubated for 1 hr at 37 °C for adapter tagmentation reaction. To stop tagmentation and solubilize DNA fragments by de-crosslinking, 10  $\mu$ L of 0.5 M EDTA, 3  $\mu$ L of 10% SDS, and 2.5  $\mu$ L of Proteinase K (20 mg/mL) are added to each sample and mixed by vortex. The reaction tubes are then incubated at 37 °C overnight. After de-crosslinking, DNA is purified by Phenol-Chloroform-Isoamyl alcohol (25:24:1) extraction and Chloroform extraction followed by ethanol precipitation. Air-dried purified DNA is dissolved in 30  $\mu$ L of 10 mM Tris-HCl pH 8.0 containing 1 mM EDTA and 25  $\mu$ g/mL RNase A. The adapter sequence-tagmented DNA fragments are amplified by PCR using 21  $\mu$ L DNA, 2  $\mu$ L of Universal i5 primer (10  $\mu$ M), 2  $\mu$ L uniquely barcoded i7 primers (10  $\mu$ M) [primer sequences are referred from (Buenrostro et al., 2015)], and 25  $\mu$ L NEBNext High-Fidelity 2x PCR Master mix (New England BioLabs, M0541S). The PCR cycle is as follows; 72 °C for 5 min, 98 °C for 30 sec, 98 °C for 10 sec, 63 °C for 10 sec, and the cycles are repeated 13 times, followed by 72 °C for 1 min. After

cooling down, the PCR products are then purified by using 55  $\mu$ L of Ampure XP beads (1.1 volume of the PCR product) and cleaning with 80 % ethanol. The cleaned DNA are then eluted with 25  $\mu$ L of 10 mM Tris-HCl (pH 8.0). The size distribution of libraries is confirmed by capillary electrophoresis using an Agilent 2100 Bioanalyzer Instrument (Agilent Technologies) and High Sensitivity DNA Chips (5067-4626) (Agilent Technologies). The barcoded libraries are quantified by KAPA Library Quantification Kit, Complete kit for ABI Prism, Illumina Platform (KK4835, 07960204001, Roche) and sample-unique primer sets are used for the amplification step. Paired-end sequencing on the barcoded libraries was performed using an Illumina HiSeq X sequencer (Illumina).

### **Bioinformatics analysis**

Barcode sequences of sequenced reads are eliminated using Trimmomatic (Bolger et al., 2014), and quality of reads are examined using FastQC (Andrews, 2010). Paired-end reads are aligned by Bowtie2 (Langmead and Salzberg, 2012) to human genome GRCh37(hg19). The mapped data is converted to bam format using SAMtools (Li et al., 2009), and narrow and broad peaks are detected using MACS (Zhang et al., 2008). Narrow peaks were detected by specifying the peak shift length 100 bp (default setting). For broad peak detection, the maximum shift length was set to 400 bp. Genome-wide distribution of peaks (bin size: 100,000), Heatmap, line plot and MA plot are made using DROMPA software (Nakato et al., 2013). Overlap of peaks are detected by using Intervene (Khan and Mathelier, 2017) and BEDTools (Quinlan and Hall, 2010). To compare data between BioMag and MyOne T1 samples, merged peaks of each replicate sample are used. Bar graphs and MA plots are generated using GraphPad Prism 8 software.

## **RESULT**

### *Con A binding assay*

To quantify the binding capacities of Dynabeads to con A, we first measured the concentration of unbound con A in the supernatant after con A-Dynabeads coupling reaction (**Figure 1A**). Amount of absorbed (i.e. beads-bound) con A was calculated by subtracting

the concentration of unbound con A from the original concentration (2.3  $\mu\text{g}/\mu\text{L}$ ). Among the four tested Dynabeads, M-280 was less capable of binding to con A, while other 3 types of Dynabeads (M-270, MyOne C1, and My One T1) exhibited comparable binding capacity in a range of 0.2-0.3  $\mu\text{g}$  biotin-conjugated recombinant con A/ $\mu\text{L}$  beads solution (**Figure 1B**).

### *Cell-binding assay*

We next compared cell binding ability of the Dynabeads to three different cell types (Daudi, HEK293T, and mouse testicular cells). After removing con A-bound cells, the number of con A-unbound cells in the supernatant was counted (**Figure 1C**). We found that M-280 and M-270, which were bigger in diameter compared with those of MyOne C1 and T1 (2.8  $\mu\text{m}$  vs. 1.05  $\mu\text{m}$ ), demonstrated relatively low capability to capture cells, especially for Daudi, although ~90% of cells were captured in all cell types (**Figure 1D**). Notably, cell-binding ability of MyOne T1 and C1 beads appeared to be equivalent or even better than that of BioMag beads (1.05  $\mu\text{m}$ ) used in the original protocol (**Figure 1D**). Particularly, MyOne T1 exhibited the best performance in all cell types, indicating the usefulness of these small-sized Dynabeads for efficient and stable cell capture.

### *CUT&Tag and data analyses*

To further test the practicality of MyOne T1 in CUT&Tag procedure, we next performed CUT&Tag in Daudi cells and compared the usability of BioMag and MyOne T1 beads. Previously, we have experienced the inconvenience of using BioMag beads during the CUT&Tag procedure in the following two points; one is the difficulty of uniform suspension of BioMag in the solution as it is easily aggregated after attaching cells to the beads (**Figure 2A**). Another is serious attachment to the wall of an Eppendorf tube. These issues could cause an inefficient cell capture. The result clearly demonstrated that MyOne T1 exhibited more efficient and uniform suspendability compared with BioMag, and there were little residual beads attached to the wall of a tube (**Figure 2B**). The beads-bound cells were then mixed with antibody against H3K4me3 or control IgG, and incubated for overnight at 4 °C. After incubation, cell-bound MyOne T1 were uniformly dissolved in the buffer, while cell-bound BioMag were severely aggregated (**Figure 2C**). Subsequently, size distribution



and concentration of the library were analyzed by capillary electrophoresis. The original CUT&Tag using BioMag reported nucleosomal ladders when anti-H3K4me3 antibody is used (Kaya-Okur et al., 2019). In agreement with the original study, nucleosomal ladders were evidently observed in BioMag, Notably, MyOne T1 showed reduced relative amount of DNA in higher (> 1000 bp) molecular weight, indicating the better performance of Tn-5 in the MyOne T1 samples (**Figure 2E**).

We next performed paired-end 150 bp-sequencing of the libraries that were made with either BioMag or MyOne T1 beads. Genome-wide distribution of the peaks were identified by comparing with the IgG control samples. Overall, the peak distribution pattern was similar between BioMag and MyOne T1 beads in a chromosome-wide level (**Figure 3A**). In a 1-2 Mb window, H3K4me3 was observed as either narrow peaks (~100 bp, **Figure 3B**) or broad peaks (~400 bp, **Figure 3C**) depending on the genome loci, and in both cases, the peak distribution and pattern were consistent between BioMag and MyOne T1 beads.

Further bioinformatic analyses demonstrated that 98.46 % of narrow peaks and 99.26 % of broad peaks from BioMag were overlapped with those from MyOne T1 beads (**Figure 4A**). In addition, peak distribution around genes was also similar between BioMag and MyOne T1 as the majority of H3K4me3 peaks were mainly distributed at upstream and genic regions rather than intergenic regions in both samples with a significant enrichment at transcription start sites (TSS) (**Figure 4B, 4C**). Furthermore, MyOne T1 showed notable numbers of MyOne T1-specific narrow and broad peaks (2723 and 1727 peaks, respectively) (**Figure 4A**), and these peaks contained relatively less upstream and more intergenic peaks as compared with the total MyOne T1 peaks (**Figure 4B**). Heatmaps and line plots of H3K4me3 peaks (both narrow and broad) from BioMag or MyOne-T1 showed similar pattern (**Figure 4D**). MA plot analyses further indicated that 4.4-10.9 % of the peaks were uniquely detected in MyOne T1 although their read counts exhibited relatively lower values (**Figure 4E**).

## DISCUSSION

The present study showed that the use of Dynabeads, especially MyOne T1, can be better alternatives to BioMag used in an original CUT&Tag protocol in terms of easy handling,

and equivalent data quality (Kaya-Okur et al., 2020; Kaya-Okur et al., 2019). Unpreferable aggregation and absorption to the wall of tubes, that were frequently observed when BioMag was used, can be minimized by using MyOne T1, potentially preventing the loss of cells and increasing the efficiency of washing process. This advantage is probably because of the hydrophobic surface of MyOne T1. Interestingly, we also found that MyOne T1 or C1 magnetic beads, that were smaller in size compared with Dynabeads M-280 or M-270, showed slightly higher ability to capture three kinds of tested cells, suggesting that smaller in size is more capable beads due to the increased surface area of beads when the same volume of beads were used.

In addition, our subsequent CUT&Tag using the MyOne T1 followed by sequencing observed remarkable similarity in H3K4me3 peaks between MyOne T1 and BioMag (**Figure 3 and 4**). Importantly, 4.4-10.9% of the H3K4me3 peaks observed using MyOne T1 showed higher enrichment at detected peak regions compared with those of BioMag, while almost no peaks showed lower enrichment (**Figure 4E**). Also considering the increased number of H3K4me3 peaks in MyOne T1 samples (**Figure 4A**), using MyOne T1 may increase the sensitivity of the CUT&Tag. This may be because the improved suspendability by MyOne T1 enhanced accessibility of IgG to the nucleus. On the other hand, MyOne T1 slightly increases the H3K4me3 peaks in intergenic regions (**Figure 4B**) implying the possibility of non-specific binding as well. Therefore to verify the specificity of MyOne T1 beads, further examination is needed.

Nevertheless, we propose that the home-made con A-conjugated Dynabeads magnetic beads (i. e. MyOne T1) can be a "stress-free" alternative choice for CUT&RUN and CUT&Tag methods. It may need to test other types of magnetic beads to find the best ones for the cell types used in your experiments.

## **ACKNOWLEDGEMENTS**

We thank members of Okada lab for useful discussion. We also thank Chie Kodama, (Veritas Corporation) for her technical advice.

**FUNDING:** This work was supported in part by JSPS KAKENHI grant number 17K15392

and 20H00446 (to Y.F.) and JST ERATO (JPMJER1901 to Y.O.)

### Conflict of Interest

This study was supported in part by VERITAS Corporation (Tokyo, Japan). Y.T. is an employee of VERITAS.

**Table 1, Comparison of Streptavidin conjugated magnetic beads**

| <b>Beads</b>                    | <b>Binding capacity to free biotin</b> | <b>Diameter of beads</b> | <b>Water binding capacity</b> |
|---------------------------------|----------------------------------------|--------------------------|-------------------------------|
| Dynabeads M-280 Streptavidin    | 650-900 pmol/mg beads                  | 2.8 $\mu\text{m}$        | Hydrophobic                   |
| Dynabeads M-270 Streptavidin    | 650-1350 pmol/mg beads                 | 2.8 $\mu\text{m}$        | Hydrophilic                   |
| Dynabeads MyOne Streptavidin C1 | >2500 pmol/mg beads                    | 1.05 $\mu\text{m}$       | Hydrophilic                   |
| Dynabeads MyOne Streptavidin T1 | >1300 pmol/mg beads                    | 1.05 $\mu\text{m}$       | Hydrophobic                   |
| BioMag Plus Concanavalin A      | NA                                     | 1.0 $\mu\text{m}$        | not known                     |

### FIGURE LEGENDS

#### Figure 1, Con A binding assay and Cell binding assay

**A**, Schematic view of con A binding assay. **B**, Con A-binding ability was compared between different magnetic beads. Columns indicate mean. Bars indicate SD. Dots indicate individual result of technical replicates. Statistical significance was assessed by one-way ANOVA followed by Turkey's multiple comparisons test with a single pooled variance. \*:  $P < 0.05$ . N=3. **C**, Schematic view of cell binding assay. **D**, Cell-binding ability of self-con A-conjugated Dynabeads magnetic beads and BioMag beads with three different kinds of cell types. Columns indicate mean. Dots indicate individual result of technical replicates. Statistical significance was assessed by one-way ANOVA followed by Turkey's multiple comparisons test with a single pooled variance. \*:  $P < 0.05$ , \*\*:  $P < 0.01$ . N=3.

### **Figure 2, CUT&Tag using BioMag and MyOneT1 beads**

**A**, Appearance of 1.5 mL tubes containing either BioMag or MyOne T1 on a magnetic stand just after removing the Binding buffer. **B**, Appearance of 1.5 mL tubes containing either BioMag or MyOne T1 in Antibody buffer 3-5 min after mixing. **C**, Appearance of 0.2 mL PCR tubes containing either BioMag or MyOne T1 that were bound with cells in Antibody buffer just after mixing (upper) and after ON incubation at 4 °C (lower). **D**, Size distribution of libraries by capillary electrophoresis using Agilent 2100 Bioanalyzer Instrument. **E**. Electropherogram plots fluorescence intensity versus size (bp) for the sample indicated above. FU: Arbitrary fluorescence unit.

### **Figure 3, Sequence results of libraries prepared from CUT&Tag**

**A**, Distribution of peaks of entire human chromosome 1. Yellow vertical lines indicate statistically significant peaks detected by DROMPA software. **B**, Distribution of Narrow peaks at gene level in the chromosome 1. Red vertical lines indicate statistically significant peaks detected by DROMPA software. **C**, Distribution of Broad peaks at gene level in the chromosome 1. Red peaks indicate statistically significant peaks detected by DROMPA software.

### **Figure 4, Comparison of H3K4me3 peaks**

**A**, Venn diagram for overlap of merged Narrow and Broad peaks between MyOne T1 (T1) and BioMag (BM). Numbers indicate the number of peaks detected. **B**, Percentage of distribution of H3K4me3 reads in upstream (transcription start site, TSS -5 kb, magenta), genic (blue), downstream (transcription end site, TES +5 kb, green), and intergenic regions (yellow). **C**, Enrichment profiles of CUT&Tag reads at TSS (0%). **D**, Heatmap analyses of CUT&Tag reads around H3K4me3 narrow or broad peaks detected using BM or T1 magnetic beads. Line plots below heatmaps represent CUT&Tag read density for each corresponding plot. **E**, MA plots show ratio intensities to compare CUT&Tag read densities at T1 and BM peaks (for a non-merged single replicate samples). Magenta circles represent log enrichment > 1, grey circles represent log enrichment  $\pm 1$ , and blue ones

represent low enrichment < -1.

## REFERENCES

1. Andrews, S. (2010). FastQC: A Quality Control Tool for High Throughput Sequence Data.
2. Bolger, A.M., Lohse, M., and Usadel, B. (2014). Trimmomatic: a flexible trimmer for Illumina sequence data. *Bioinformatics* 30, 2114-2120.
3. Buenrostro, J.D., Wu, B., Litzenburger, U.M., Ruff, D., Gonzales, M.L., Snyder, M.P., Chang, H.Y., and Greenleaf, W.J. (2015). Single-cell chromatin accessibility reveals principles of regulatory variation. *Nature* 523, 486-490.
4. Kaya-Okur, H.S., Janssens, D.H., Henikoff, J.G., Ahmad, K., and Henikoff, S. (2020). Efficient low-cost chromatin profiling with CUT&Tag. *Nat Protoc* 15, 3264-3283.
5. Kaya-Okur, H.S., Wu, S.J., Codomo, C.A., Pledger, E.S., Bryson, T.D., Henikoff, J.G., Ahmad, K., and Henikoff, S. (2019). CUT&Tag for efficient epigenomic profiling of small samples and single cells. *Nat Commun* 10, 1930.
6. Khan, A., and Mathelier, A. (2017). Intervene: a tool for intersection and visualization of multiple gene or genomic region sets. *BMC Bioinformatics* 18, 287.
7. Langmead, B., and Salzberg, S.L. (2012). Fast gapped-read alignment with Bowtie 2. *Nat Methods* 9, 357-359.
8. Li, H., Handsaker, B., Wysoker, A., Fennell, T., Ruan, J., Homer, N., Marth, G., Abecasis, G., Durbin, R., and Genome Project Data Processing, S. (2009). The Sequence Alignment/Map format and SAMtools. *Bioinformatics* 25, 2078-2079.
9. Meers, M.P., Bryson, T.D., Henikoff, J.G., and Henikoff, S. (2019). Improved CUT&RUN chromatin profiling tools. *Elife* 8.
10. Nakato, R., Itoh, T., and Shirahige, K. (2013). DROMPA: easy-to-handle peak calling and visualization software for the computational analysis and validation of ChIP-seq data. *Genes Cells* 18, 589-601.
11. Quinlan, A.R., and Hall, I.M. (2010). BEDTools: a flexible suite of utilities for comparing genomic features. *Bioinformatics* 26, 841-842.

12. Skene, P.J., and Henikoff, S. (2017). An efficient targeted nuclease strategy for high-resolution mapping of DNA binding sites. *Elife* 6.
13. Zhang, Y., Liu, T., Meyer, C.A., Eeckhoute, J., Johnson, D.S., Bernstein, B.E., Nusbaum, C., Myers, R.M., Brown, M., Li, W., *et al.* (2008). Model-based analysis of ChIP-Seq (MACS). *Genome Biol* 9, R137.

Figure 1

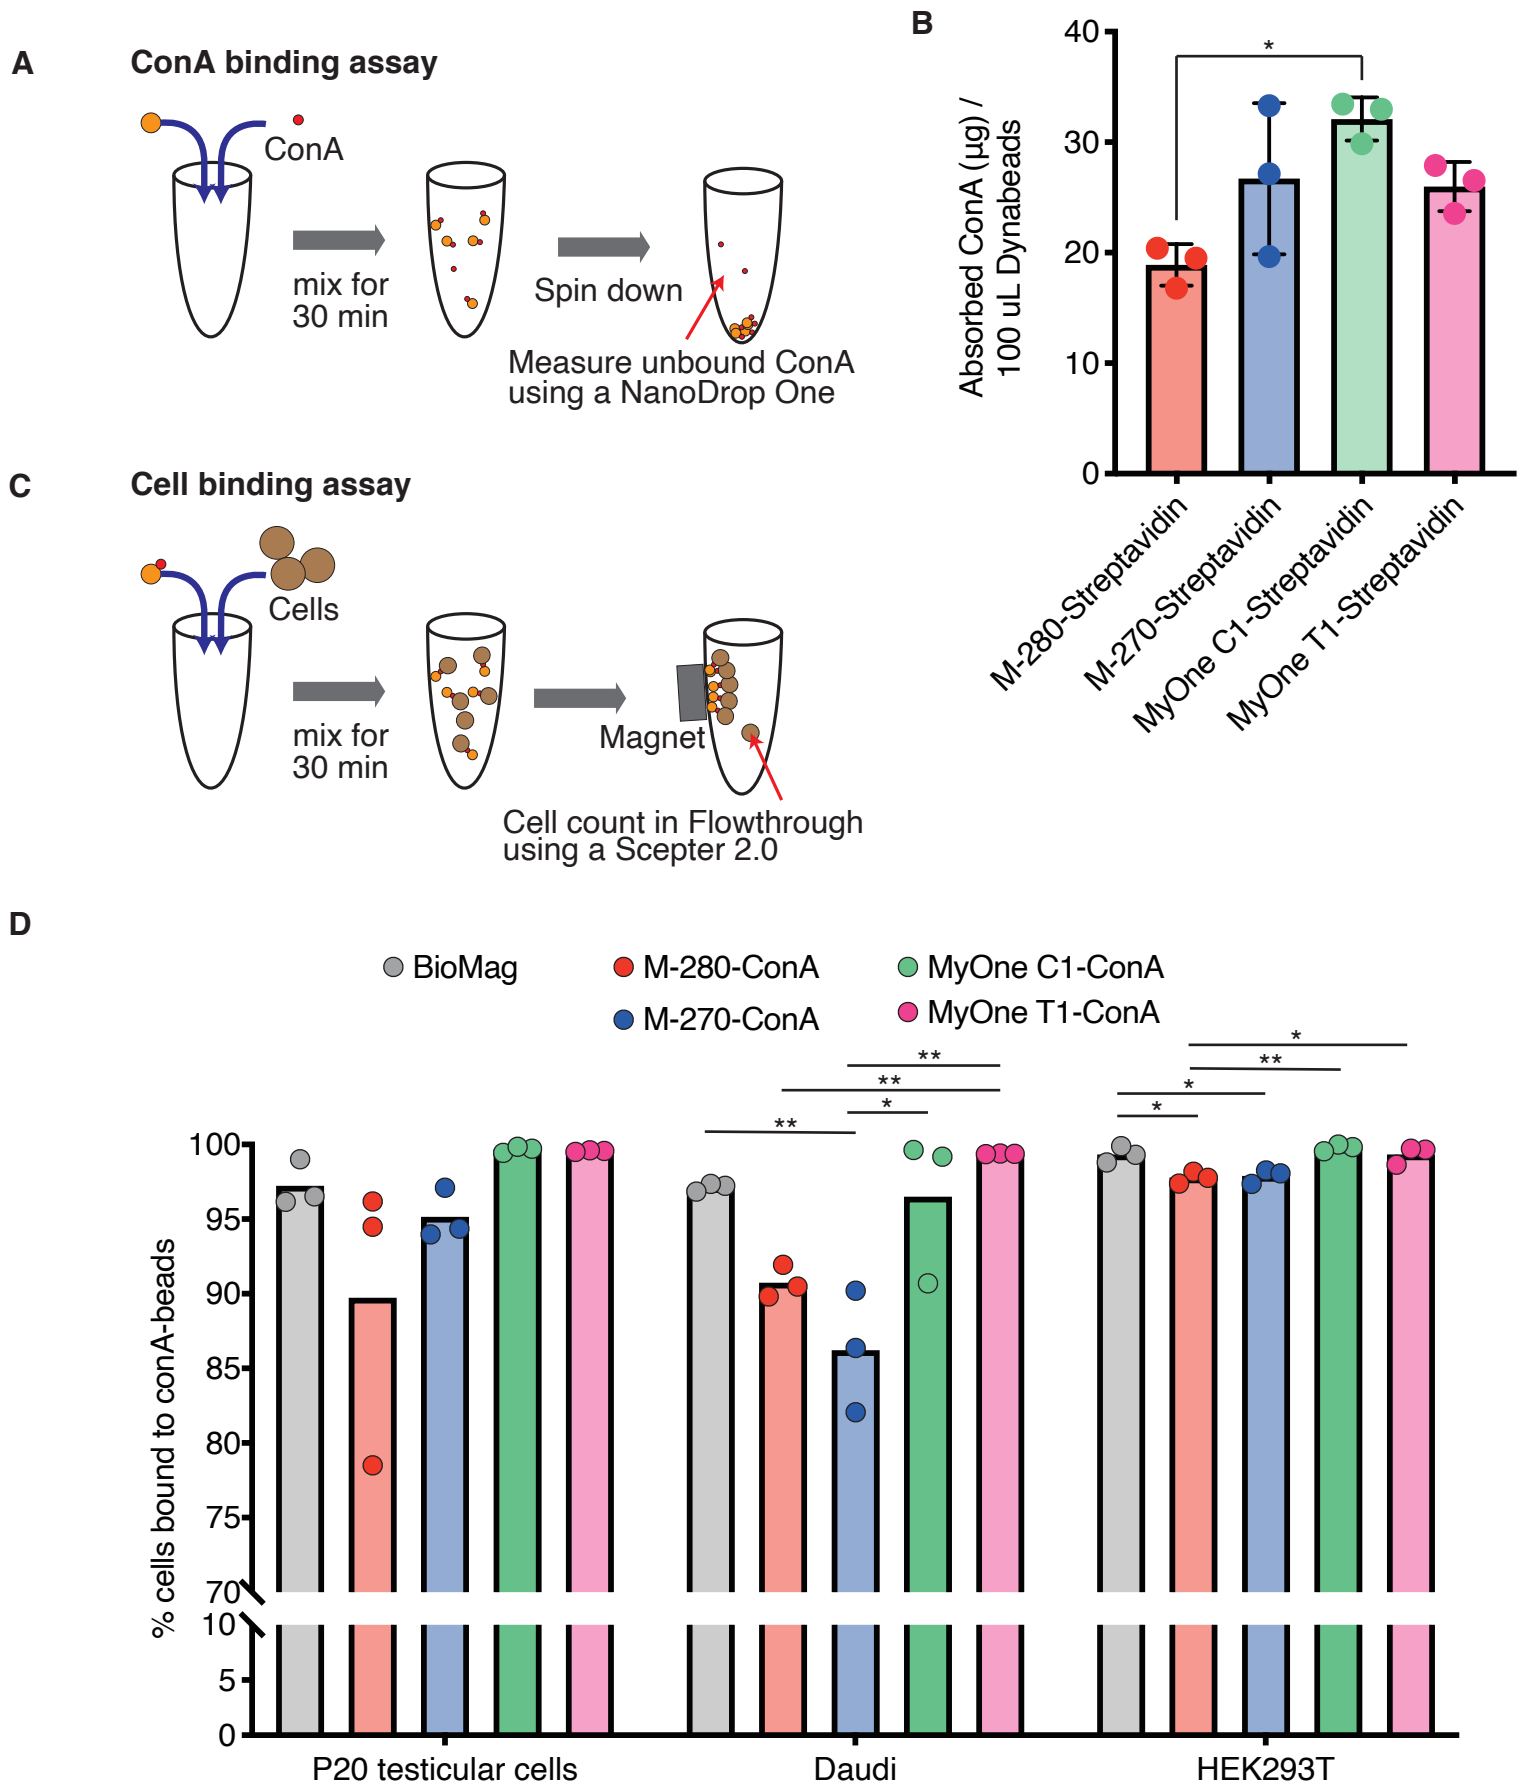

**Figure 2**

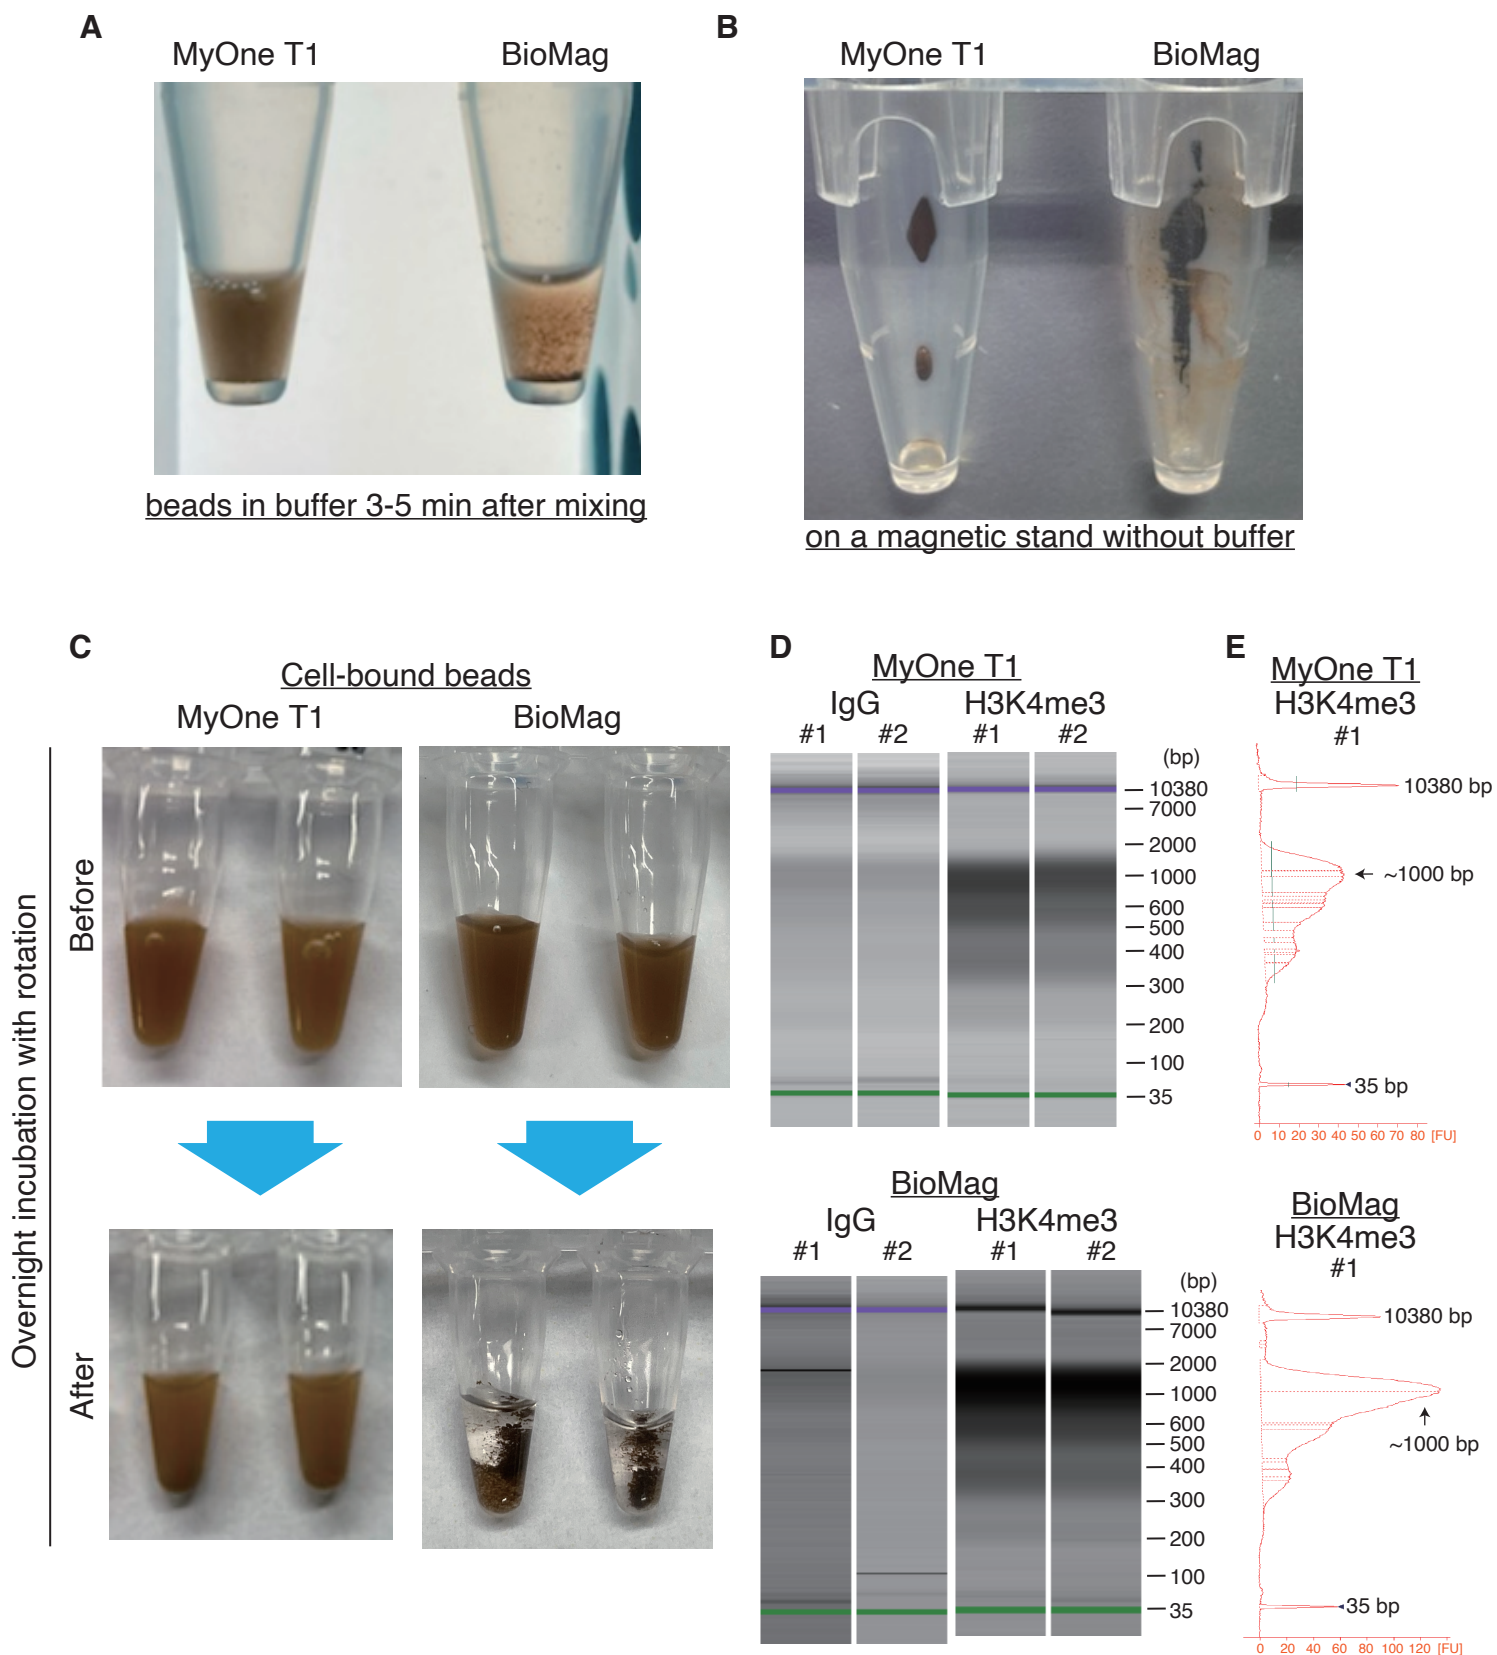



### Figure 3

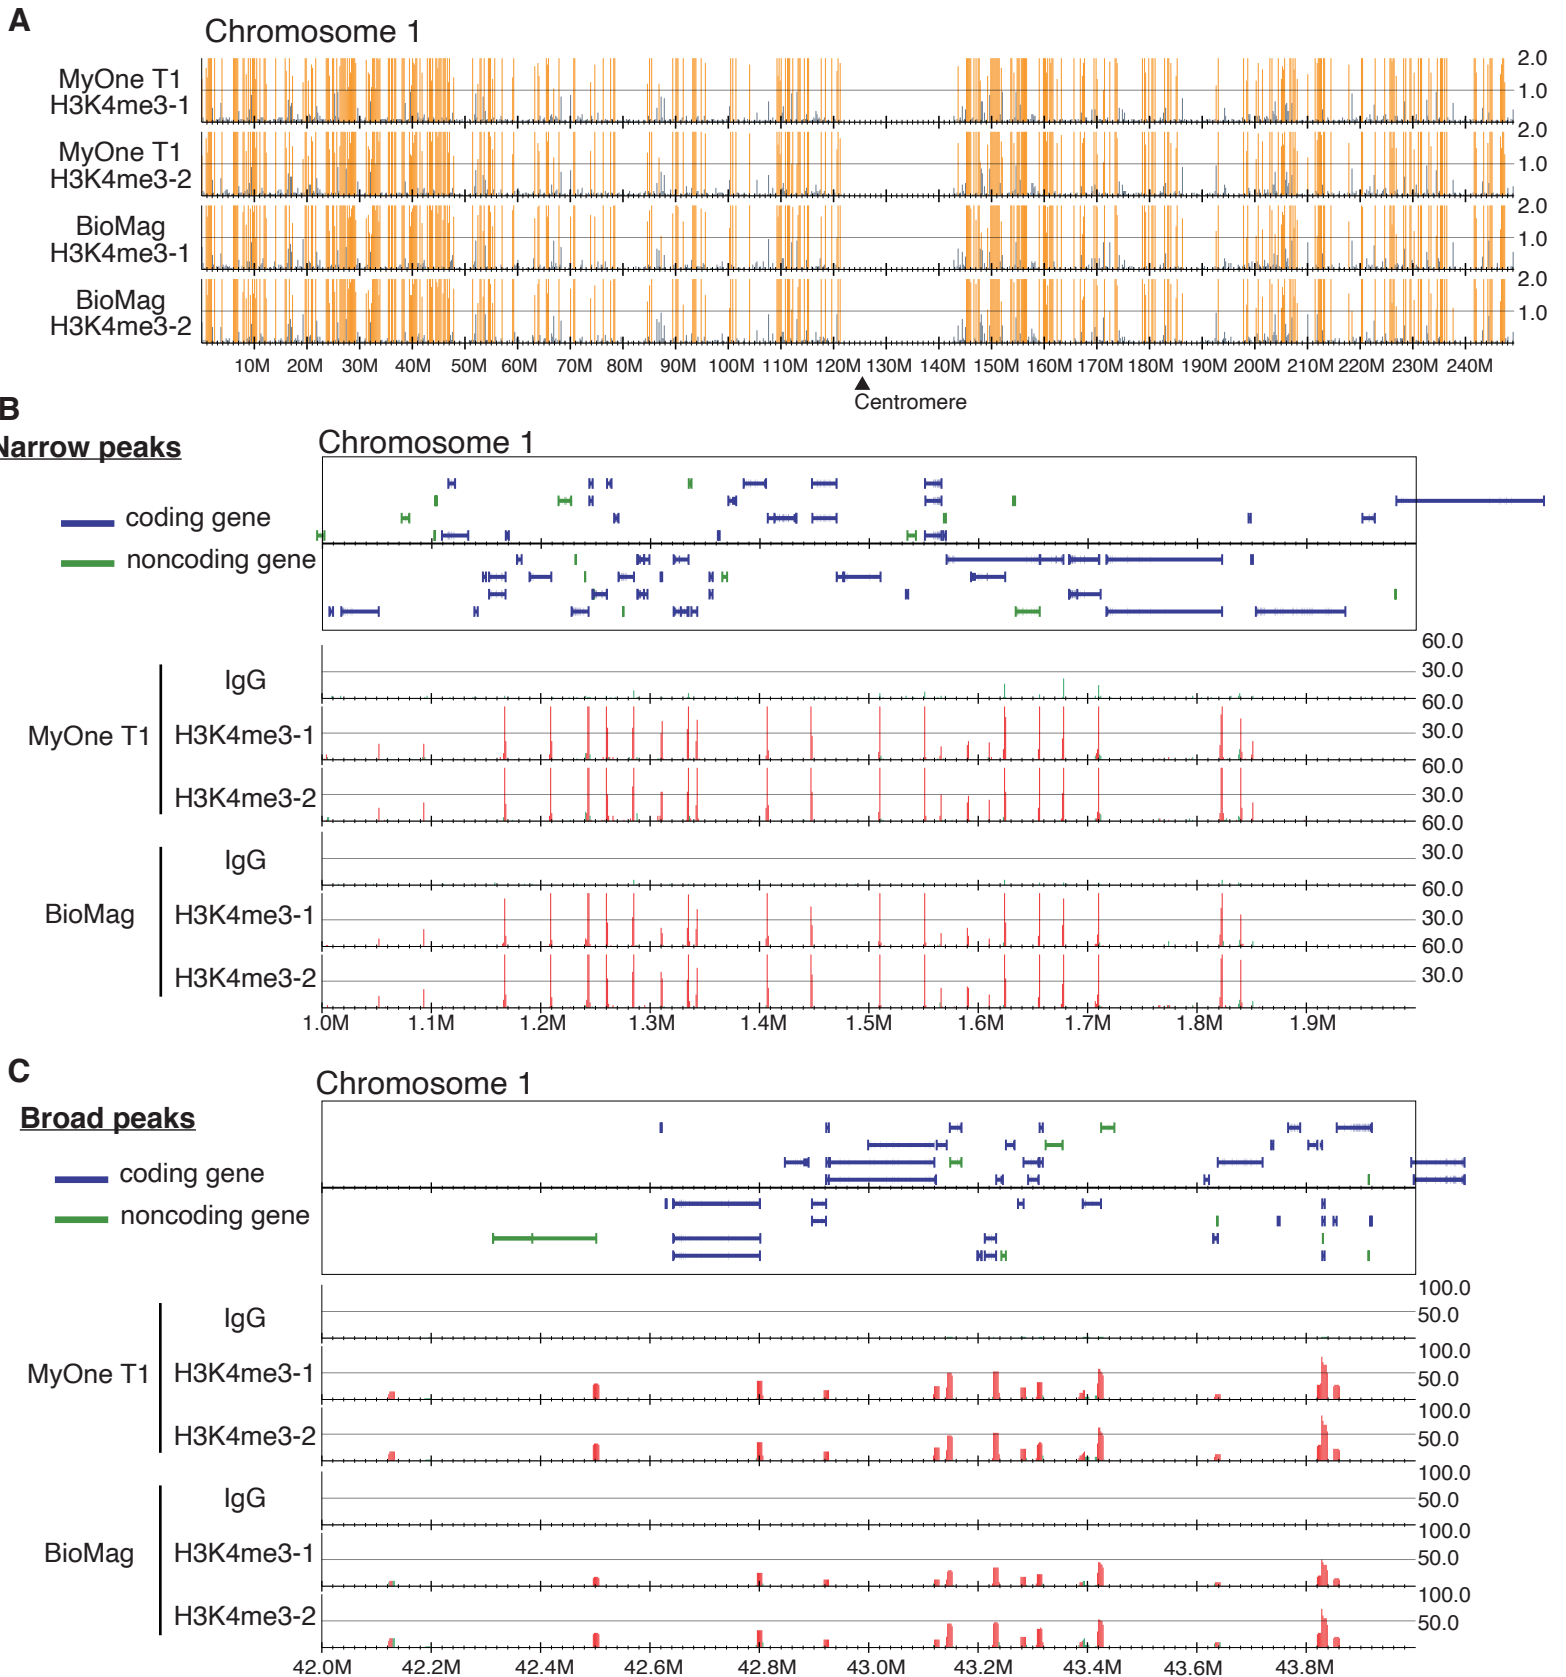

**Figure 4**

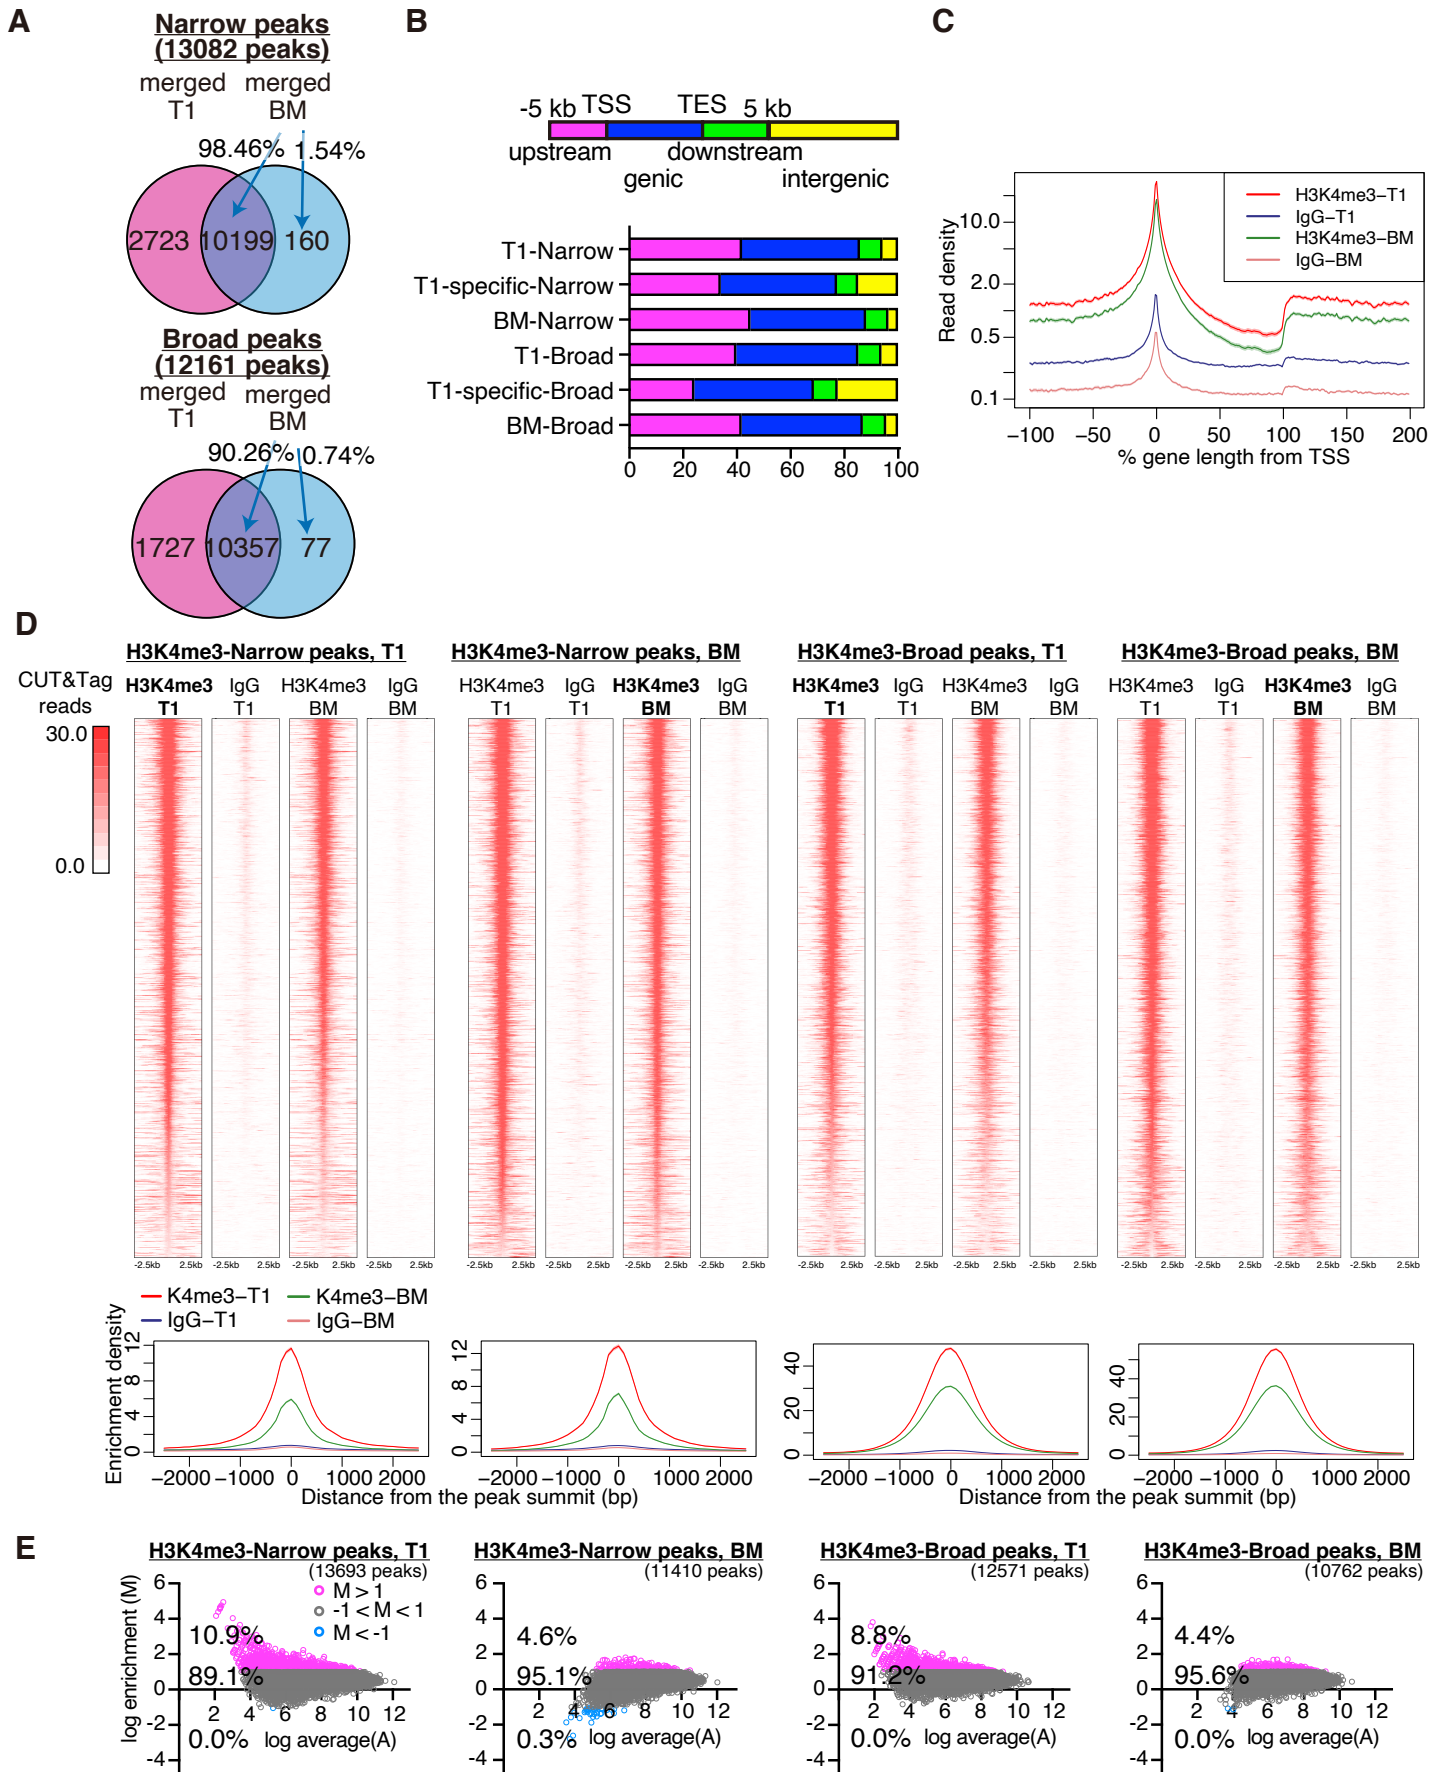

Source: https://biorxiv.org/content/10.1101/2021.04.04.438416v1.full.pdf
